# Supplementary material for: Flexible paper electrodes constructed from Zn2GeO4 nanofibers anchored with amorphous carbon for advanced lithium ion batteries
Source: Royal Society of Chemistry journal article supplement (doi:10.1039/c5ta08779a), 2016-01-01
Supplement: c5ta08779a1.pdf [file c5ta08779a1.pdf]

## Supporting Information

### Flexible paper electrode constructed of Zn<sub>2</sub>GeO<sub>4</sub> nanofibers anchored with amorphous carbon for advanced lithium ion batteries

Huan-Huan Li, Lin-Lin Zhang, Chao-Ying Fan, Xing-Long Wu, Hai-Feng Wang, Xiao-Ying Li, Kang Wang, Hai-Zhu Sun,\* Jing-Ping Zhang\*

### Experimental Section

**Materials:** All the materials were purchased from Beijing Chemical Reagent Factory without further purification. Polyacrylic acid (PAA, M.W~450,000), GeO<sub>2</sub> (99.99%, metal basis, 200 mesh), Zn(CH<sub>3</sub>COOH)<sub>2</sub> · 2H<sub>2</sub>O (99.99%, metal basis), citric acid monohydrate (A.R).

**Preparation of ZGO/C-P:** The starting material (Zn<sub>2</sub>GeO<sub>4</sub> nanorod) was prepared according to Perng *et.al*'s work using a simple reflux method.<sup>[1]</sup> 200 mg prepared Zn<sub>2</sub>GeO<sub>4</sub> nanorod was added into a 7.5 wt % aqueous PAA solution, and the mixture was stirred for 1 h at room temperature, the citric acid was added slowly until the solution becomes clear and transparent. Then, the resulting viscous solution was loaded into a plastic syringe equipped with a flat stainless steel needle of 0.9 mm in diameter and electrospun using an electrospinning system. Finally, the obtained Zn<sub>2</sub>GeO<sub>4</sub>/PAA fibers was carbonized by calcination at 700°C for 5 h under N<sub>2</sub> atmosphere to gain the ZGO/C-P production.

**Material characterization:** The structure of the obtained ZGO/C-P was characterized by X-ray diffraction (XRD, Rigaku P/max 2200VPC) using Cu K $\alpha$  radiation. X-ray photoelectron spectra (XPS) were performed with Al K $\alpha$  radiation and energy step size of 0.1 eV. Transmission electron microscope (TEM, JEM-2010F, 200 kV) and scanning electron microscope (SEM, JEOL JSM-6700F Field Emission) were used to study the morphology of the products.

**Electrochemical measurement:** Pure lithium foil was used as the counter electrode and a 1.0 M LiPF<sub>6</sub> in 1:1 v/v ethylene carbonate (EC)/dimethyl carbonate (DMC) as the electrolyte. The 2032 coin cells were assembled in an Ar-filled glovebox with the concentrations of moisture and oxygen all below 0.1 ppm. Galvanostatic cycling measurements were made using a Land battery test system

(LAND CT2001A) from 0.005 to 2.9 V. ZGO/C-P was directly used as the working electrodes. Cyclic voltammetry (CV) curves were taken using a VersaSTAT 3 (Princeton Applied Research) over the potential range of 0.005-2.9 V at a scan rate of 0.1 mV/s.

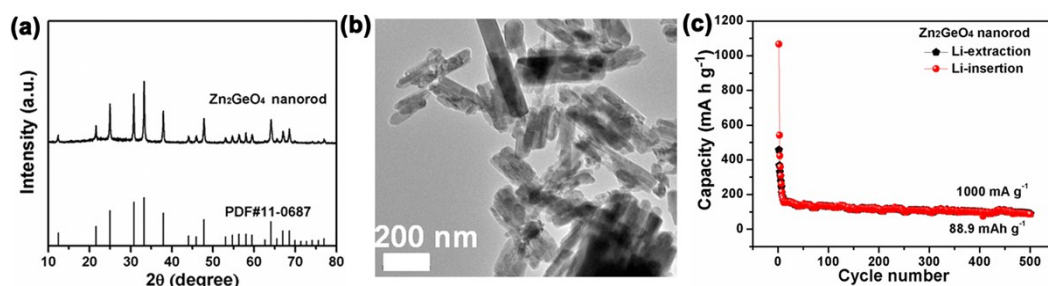

**Figure S1.** (a) XRD pattern, (b) TEM image and (c) cycle performance of the starting material: the prepared  $\text{Zn}_2\text{GeO}_4$  nanorod.

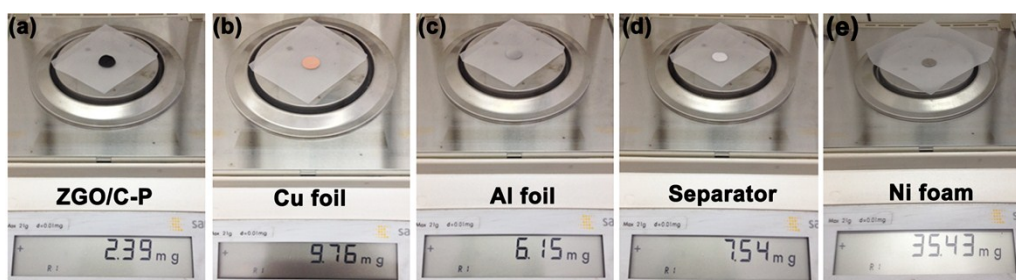

**Figure S2.** Weight comparison of (a) ZGO/C-P, (b) Cu foil, (c) Al foil, (d) separator, and (e) Ni foam at the same large area of  $1.44 \text{ cm}^2$ .

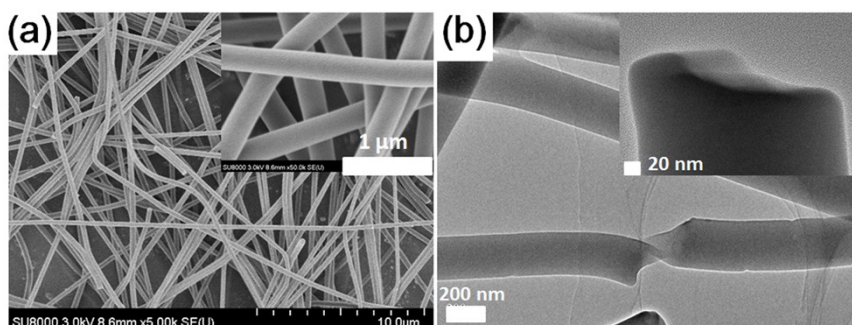

**Figure S3.** (a) SEM and (b) TEM images of the ZGO in CA-PAA precursor.

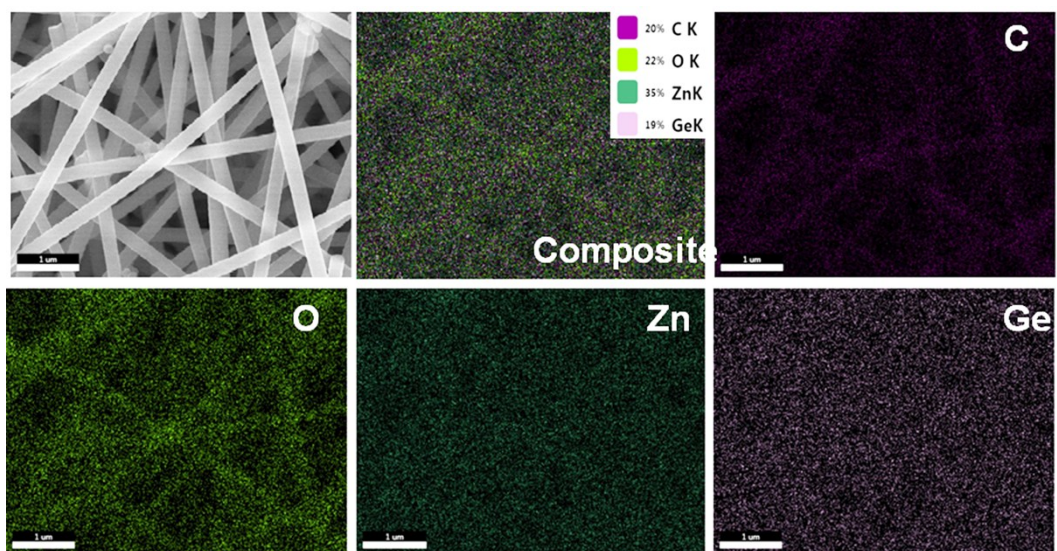

**Figure S4.** The EDS maps of ZGO/C-P composite samples, an even distribution of carbon, oxygen, zinc, and germanium..

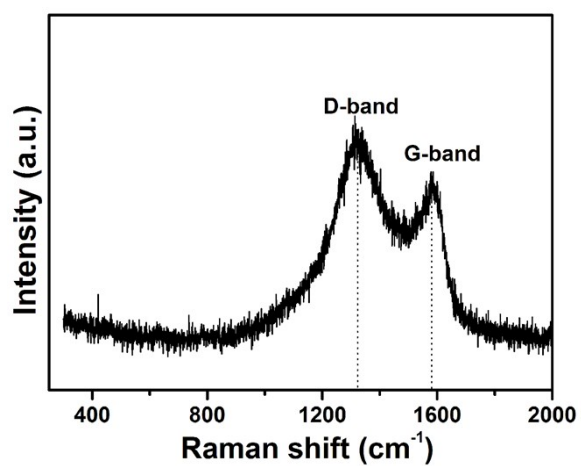

**Figure S5.** Raman spectrum of the ZGO/C-P composite.

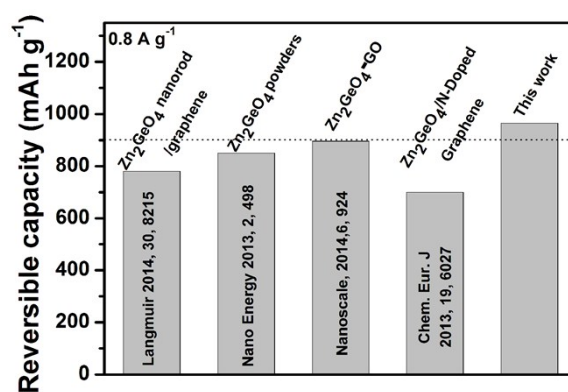

**Figure S6.** Comparison of the electrochemical performance with the reported results.

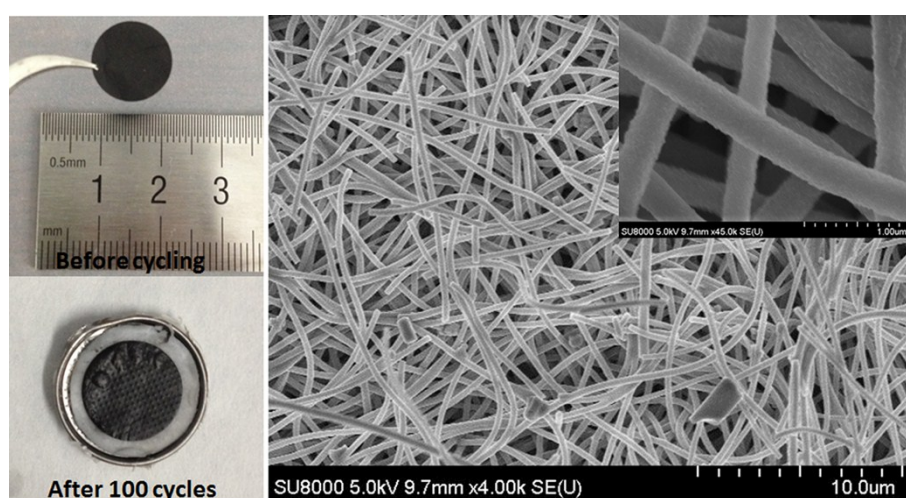

**Figure S7.** SEM image of ZGO/C-P after 100 cycles at a current density of 1 A g<sup>-1</sup>.

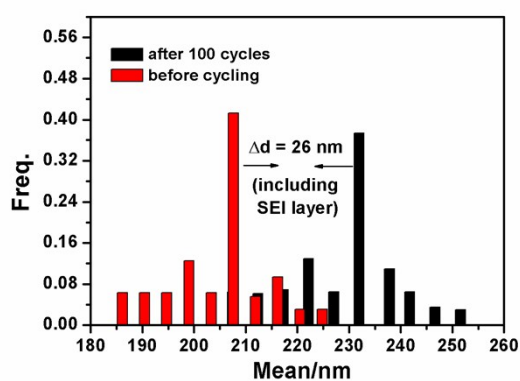

**Figure S8.** Diameter size distributions of ZGO/C-P before and after running 100 cycles.

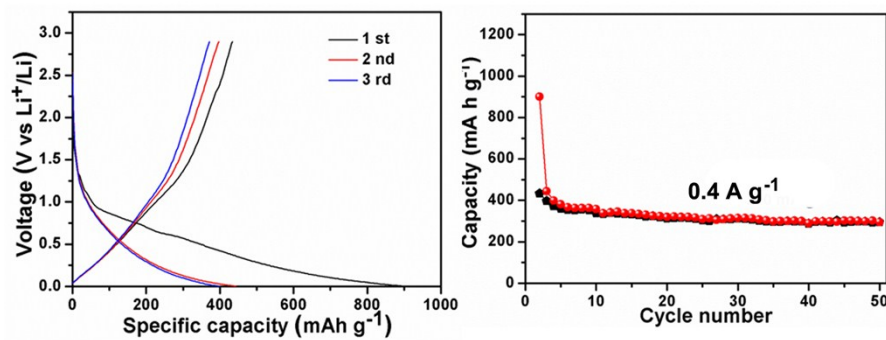

**Figure S9.** (a) Galvanostatic charge–discharge profiles (b) cyclic performance of  $C_{PAA}$  at  $0.4 \text{ A g}^{-1}$ .

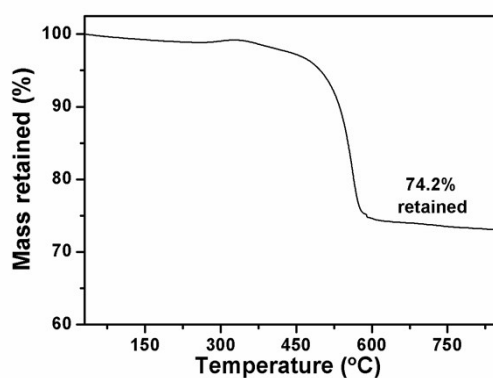

**Figure S10.** TGA curve of ZGO/C-P carried out in air atmosphere.

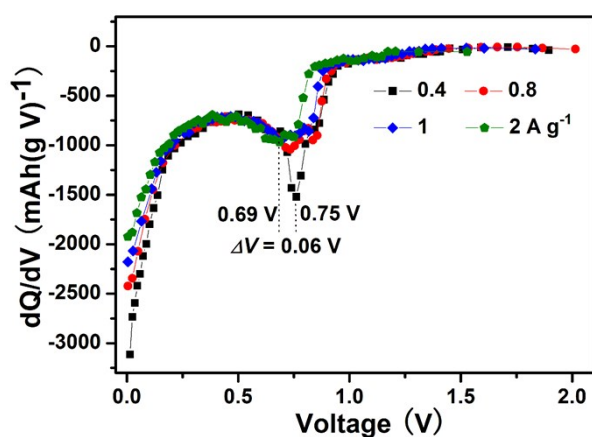

**Figure S11.** The  $dQ/dV$  differential curves of the discharge profiles of ZGO/C-P under different current densities.

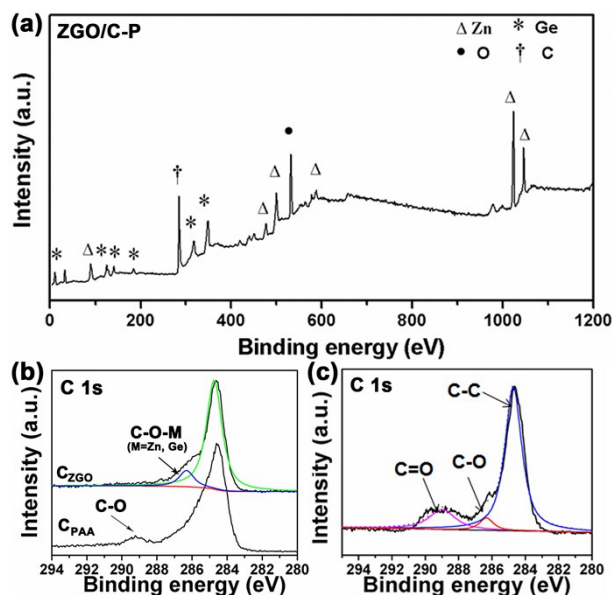

**Figure S12.** (a) A survey XPS and C 1s peaks of ZGO/C-P. (b) High-resolution XPS spectra of the C 1s peaks for  $C_{PAA}$  and  $C_{ZGO}$  before cycling. (c) High-resolution XPS spectrum of the C 1s peaks for  $C_{ZGO}$  after 100 cycles.

## References

- [1] M.-Y. Tsai, S.-H. Huang, T.-P. Perng, *J. Lumin.* 2013, **136**, 322-327.
